# Supplementary material for: Non-precious metal high-entropy alloys with d–d electron interactions for efficient and robust hydrogen oxidation reactions in alkaline media
Source: Royal Society of Chemistry journal article supplement (doi:10.1039/d4qi00103f), 2024-01-01
Supplement: d4qi00103f1.pdf [file d4qi00103f1.pdf]

## SUPPORTING INFORMATION

# **Non-precious metal high-entropy alloy with d-d electron interaction for efficient and robust hydrogen oxidation reaction in alkaline media**

Jin-Tao Ren, Lei Chen, Hao-Yu Wang, and Zhong-Yong Yuan\*

School of Materials Science and Engineering, Smart Sensing Interdisciplinary Science Center, Key Laboratory of Advanced Energy Materials Chemistry (Ministry of Education), Nankai University, Tianjin 300350, China

\* Corresponding author. [zyyuan@nankai.edu.cn](mailto:zyyuan@nankai.edu.cn)

## 1. Experimental section

### Synthesis of FeCoNiMoW HEA nanoparticles supported on HPC

Typically, 0.5 mmol of  $\text{FeCl}_3 \cdot 6\text{H}_2\text{O}$ , 0.5 mmol of  $\text{CoCl}_2 \cdot 6\text{H}_2\text{O}$ , 0.5 mmol of  $\text{NiCl}_2 \cdot 6\text{H}_2\text{O}$ , 0.5 mmol of  $\text{MoCl}_5$ , 0.5 mmol of  $\text{WCl}_6$ , 20 mmol of 2-methylimidazole, and 1.5 g of polyacrylonitrile (PAN) were added into a 45 mL stainless steel grinding jar with many steel beads. The mixture was then grinding for 180 min in a Retsch MM400 grinder mill operating at 30 Hz. The resultant products were collected. For the carbonization process, the mixture was heated to 300 °C in Ar with a heating rate of 2 °C  $\text{min}^{-1}$  and maintained for 3 h. Then, the furnace was heated to 900 °C under 10%  $\text{H}_2/\text{Ar}$  atmosphere and maintained for 3 h. Finally, the as-synthesized FeCoNiMoW HEA/HPC was obtained after the furnace cooling down to room temperature under Ar atmosphere.

### Synthesis of metal alloy nanoparticles supported on HPC

Ni/HPC, FeCoNi/HPC, FeCoNiMo/HPC, and FeCoNiW/HPC were also synthesized through the same processes with those of FeCoNiMoW HEA/HPC. The precursor solutions of above control samples contained 2.5 mmol of metal salts with same ratio, 20 mmol of 2-methylimidazole, and 1.5 g of PAN.

### Materials characterizations

X-ray diffraction (XRD) patterns were recorded on a Rigaku Smart Lab 3kW diffractometer using  $\text{Cu } K\alpha$  ( $\lambda = 1.5418 \text{ \AA}$ ) radiation. Scanning electron microscopy (SEM) images were obtained on a Jeol JSM-7800F microscope. Transmission electron microscopy (TEM), high-resolution transmission electron microscopy (HRTEM), and energy-dispersive X-ray spectroscopy (EDX) were acquired with a Jeol JEM-2800 electron microscope operating at 200 kV. X-ray photoelectron spectroscopy (XPS) was conducted on Thermo Scientific ESCALAB 250Xi with  $\text{Al } K\alpha$  X-ray source (1486.6 eV). The C 1s peak (284.8 eV) was used as the reference standard for the binding energy. Raman spectroscopy was performed on a RTS-HiR-AM spectrometer with laser excitation at 520 nm wavelength.

### Electrochemical measurements

A standard three-electrode cell system along with an electrochemical workstation (CHI model 760E) was applied for all the electrochemical measurements. A graphite rod was used as the counter electrode and a Hg/HgO electrode was used as the reference electrode in alkaline media. The Hg/HgO reference electrode was calibrated to a homemade reversible hydrogen electrode. During the electrochemical measurements, the working electrode was prepared by coating the electrocatalyst on a glassy carbon electrode (GCE, 5 mm in diameter). First, the electrocatalyst powders (5 mg) were dispersed in a mixed solution containing deionized water (245  $\mu\text{L}$ ), isopropanol (735  $\mu\text{L}$ ), and Nafion solution (5 wt%, 20  $\mu\text{L}$ ).

Then, the homogeneous electrocatalyst ink (10  $\mu\text{L}$ ) was dropped onto the GCE surface and dried to obtain the working electrode. For HOR test, LSV was performed in  $\text{H}_2$ -saturated 0.1 M KOH solution at a scan rate of  $1.0 \text{ mV s}^{-1}$ . The GCE coated with electrocatalyst of  $0.25 \text{ mg}_{\text{catalyst}} \text{ cm}^{-2}$  was used for durability tests in  $\text{H}_2$ -saturated 0.1 M KOH solution, and chronoamperometry test was performed at a rotation speed of 1600 rpm. To evaluate the resistance to CO poisoning of different catalysts, the working electrode with the mass loading of  $0.25 \text{ mg}_{\text{catalyst}} \text{ cm}^{-2}$  on GCE was evaluated *via* chronoamperometry test at 0.1 V vs. RHE in  $\text{H}_2/1000 \text{ ppm}$  CO-saturated KOH solution (0.1 M).

The specific exchange current density ( $j_0$ ) which is normalized to the electrode area was obtained by fitting  $j_k$  with Butler–Volmer equation.<sup>1,2</sup>

$$j_k = j_0 \left( e^{\frac{\alpha F}{RT} \eta} - e^{-\frac{(1-\alpha)F}{RT} \eta} \right)$$

where  $j_0$  is the exchange current,  $\alpha$  is the charge transfer coefficient,  $R$  is the universal gas constant ( $8.314 \text{ J mol}^{-1} \text{ K}^{-1}$ ),  $T$  is the temperature (K),  $\alpha$  and  $j_0$  are set as variables.

The kinetic current ( $j_k$ ) was calculated based on the Koutecky–Levich equation.<sup>3</sup>

$$\frac{1}{j} = \frac{1}{j_k} + \frac{1}{j_d} = \frac{1}{j_k} + \frac{1}{BC_0 \omega^{1/2}} = \frac{1}{j_k} + \frac{1}{0.62nFD^{2/3}V^{-1/6}C_0 \omega^{1/2}}$$

where  $j$  stands for the measured current density,  $j_d$  represents the diffusion current density,  $B$  is the Levich constant,  $C_0$  is the solubility of  $\text{H}_2$  ( $7.33 \times 10^{-4} \text{ mol L}^{-1}$ ),  $F$  is Faraday constant ( $96485 \text{ C mol}^{-1}$ ),  $D$  is the  $\text{H}_2$  diffusion coefficient in 0.1 M NaOH,  $\nu$  is the kinematic viscosity ( $1.01 \times 10^{-2} \text{ cm}^2 \text{ s}^{-1}$ ), and  $\omega$  is the rotating rate.  $j_d$  can be obtained based on Nernstian diffusion overpotential equation.<sup>1</sup>

$$j_d = j_l \left( 1 - \exp\left(-\frac{2F\eta}{RT}\right) \right)$$

where  $j_l$  is the diffusion-limited current,  $\eta$  represents the overpotential.

## DFT Calculations

First-principles computations on basis of DFT were performed with the plane-wave technique as implemented in the Vienna ab initio simulation package (VASP).<sup>4,5</sup> The projector augmented wave (PAW) pseudopotential was utilized and a 500 eV cutoff was adopted for the plane wave basis set.<sup>6</sup> The generalized gradient approximation (GGA) involving the Perdew, Burke, and Ernzerhof (PBE) functional was used.<sup>7,8</sup> A vacuum space with at least 15 Å was inserted between the surface adsorption model and its periodically repeated images. The k-point sampling of the Brillouin zone was obtained using  $2 \times 2 \times 1$  by Monkhorst–Pack scheme. All DFT calculations are to minimize the total energy until the convergence criterion of  $10^{-4} \text{ eV}$ , and all the residual forces were converged to  $0.05 \text{ eV \AA}^{-1}$ . The Brillouin zone is

sampled with a Gamma-centered special k-points grid of  $2 \times 2 \times 1$  for geometry optimization. The free energy was calculated on the basis of the computational hydrogen electrode (CHE) model.<sup>9,10</sup>

Adsorption energy  $\Delta E$  of H atom on the surface of substrates was defined as:

$$\Delta E = E_{*H} - (E^* + E_H)$$

where  $*H$  and  $*$  denoted the adsorption of H atom on substrates and the bare substrates,  $E_H$  denoted the half energy of  $H_2$  gas.

Gibbs free energy change ( $\Delta G$ ) of each chemical reaction was calculated by:

$$\Delta G = \Delta E + \Delta ZPE - T\Delta S$$

where  $E$ , ZPE, T and S denote the calculated total energy, zero point energy, temperature and entropy, respectively.

## 2. Supplementary figures

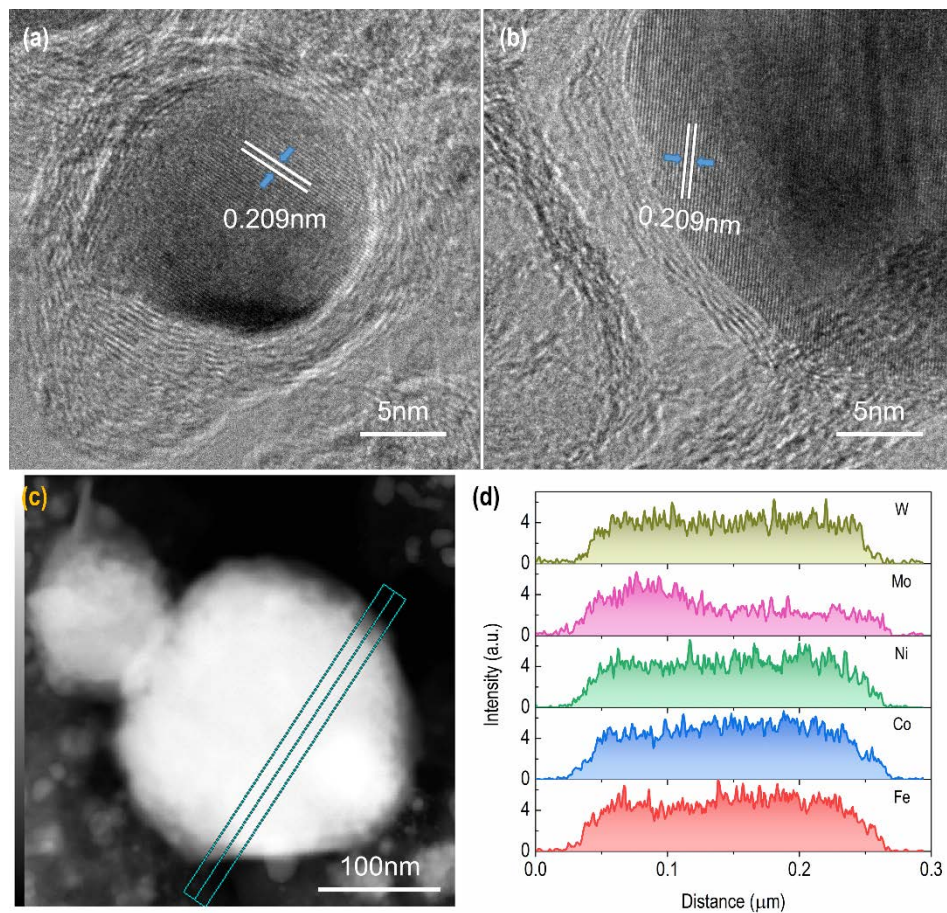

**Fig. S1** (a,b) High-resolution TEM images of HEA/HPC. (c,d) Line-scan STEM-EDX spectra of HEA/HPC in the area marked in STEM image.

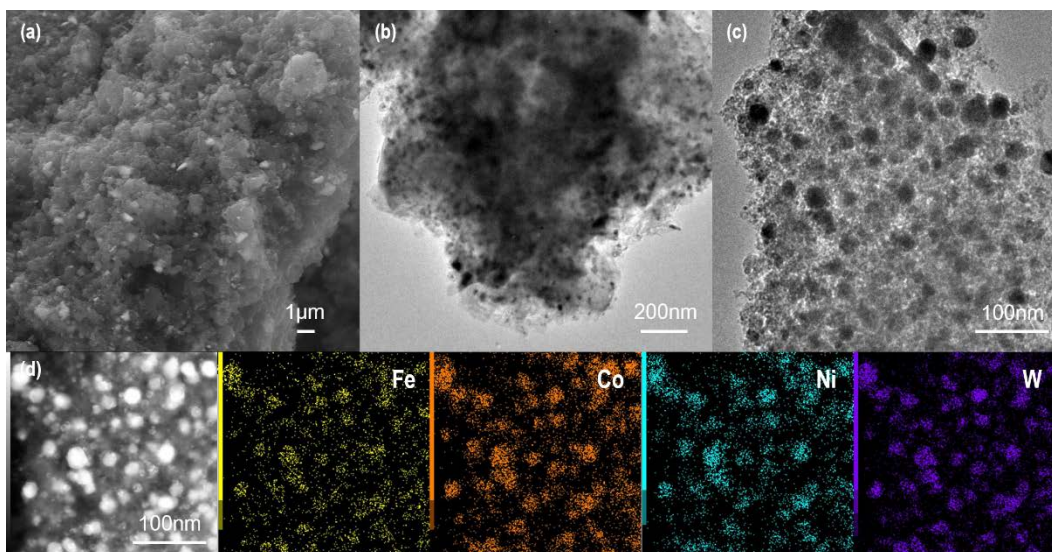

**Fig. S2** (a) SEM, and (b,c) TEM images of FeCoNiW/HPC sample. (d) STEM-EDX mapping images of the NPs supported on HPC substrate.

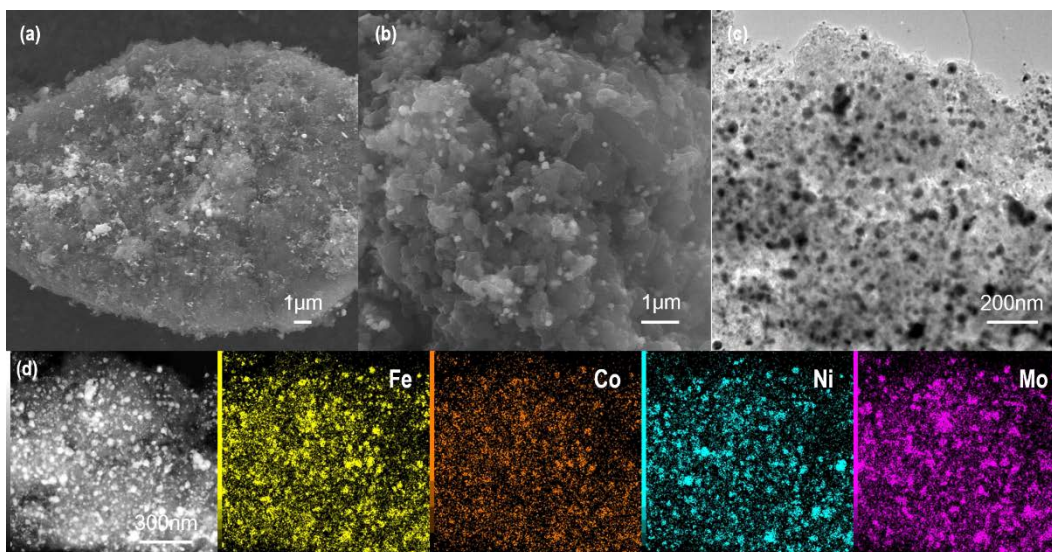

**Fig. S3** (a) SEM, and (b,c) TEM images of FeCoNiMo/HPC sample. (d) STEM-EDX mapping images of the NPs supported on HPC substrate.

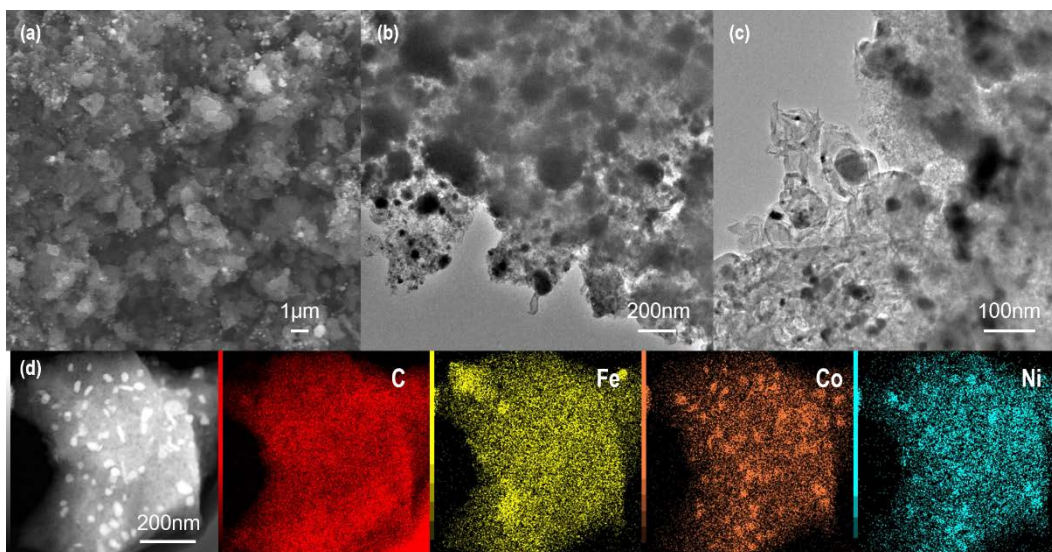

**Fig. S4** (a) SEM, and (b,c) TEM images of FeCoNi/HPC sample. (d) STEM-EDX mapping images of the NPs supported on HPC substrate.



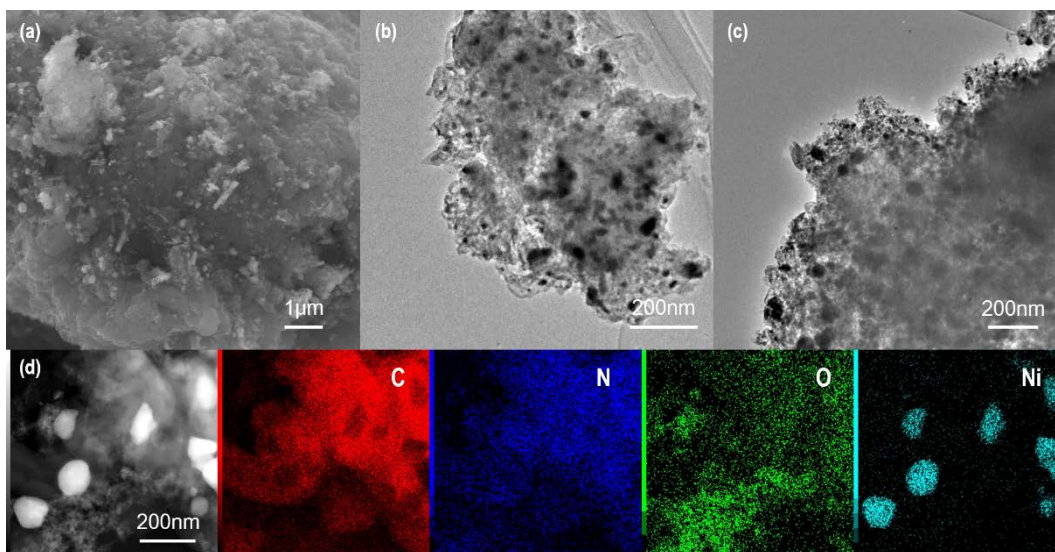

**Fig. S5** (a) SEM, and (b,c) TEM images of Ni/HPC sample. (d) STEM-EDX mapping images of the NPs supported on HPC substrate.

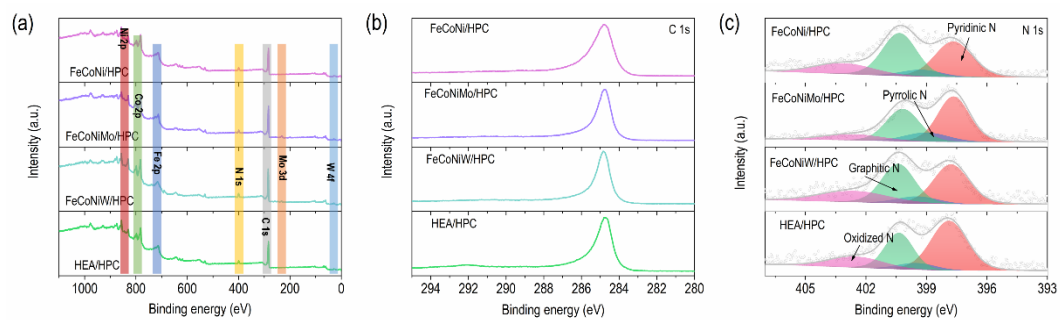

**Fig. S6** (a) XPS survey spectra, and high-resolution XPS spectra of C 1s (b) and N 1s (c) of the prepared catalysts.

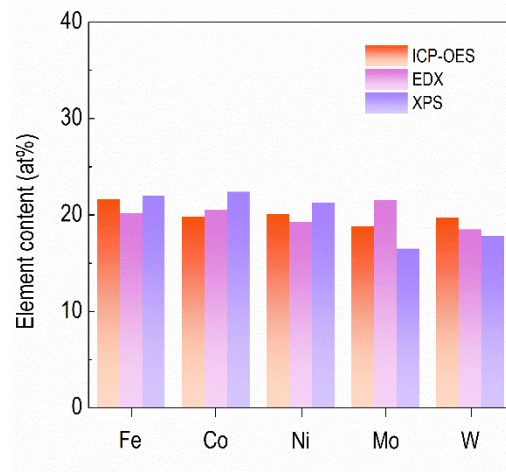

**Fig. S7** The overall atomic percentages of metals in the FeCoNiMoW HEA/HPC as determined by ICP-OES, EDX, and XPS spectra. The calculation of mixed entropy for HEAs could be made following the equation:  $\Delta S_{mix} = -R \sum_{i=1}^n X_i \ln X_i$ , where  $\Delta S_{mix}$  is the configurational entropy of mixing,  $R$  is the gas constant,  $X_i$  is the molar ratio of component  $i$ , and  $n$  is the total number of elements involved. Therefore, the calculated mixing entropy of  $\Delta S$  is higher than  $1.50 R$ , illustrating the formation of HEA.

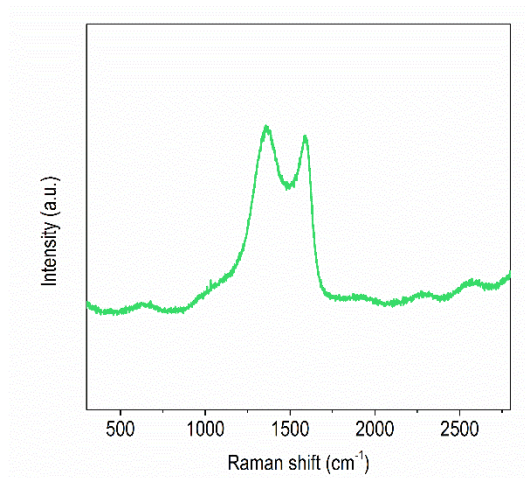

**Fig. S8** Raman spectrum of FeCoNiMoW HEA/CNFs.

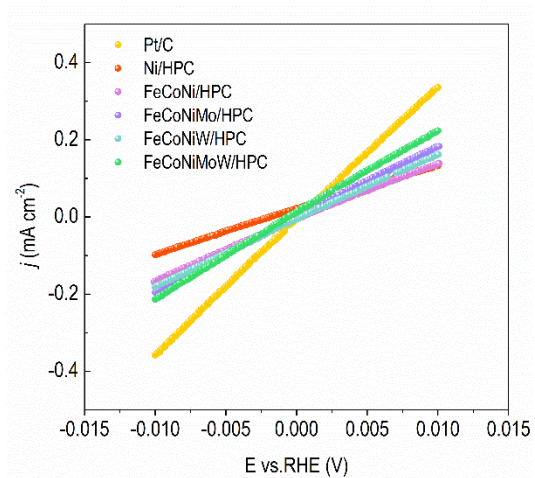

**Fig. S9** Linear fitting curves at micropolarization region of HOR/HER.

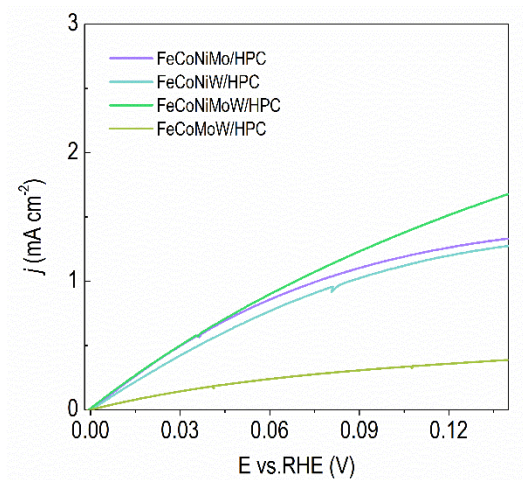

**Fig. S10** LSV curves of the as-prepared catalysts in  $\text{H}_2$ -saturated 0.1 M KOH.

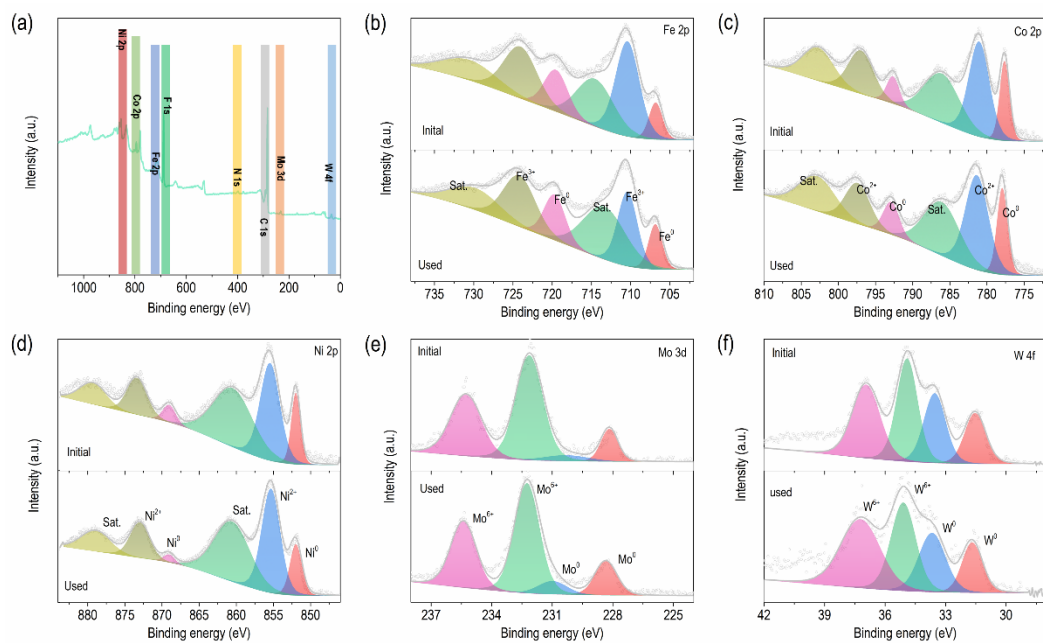

**Fig. S11** (a) XPS survey spectra of the HEA/HPC catalyst after HOR test. High-resolution XPS spectra of Fe 2p (b), Co 2p (c), Ni 2p (d), Mo 3d (e), and W 4f (f) core levels for the HEA/HPC catalyst before and after HOR test.

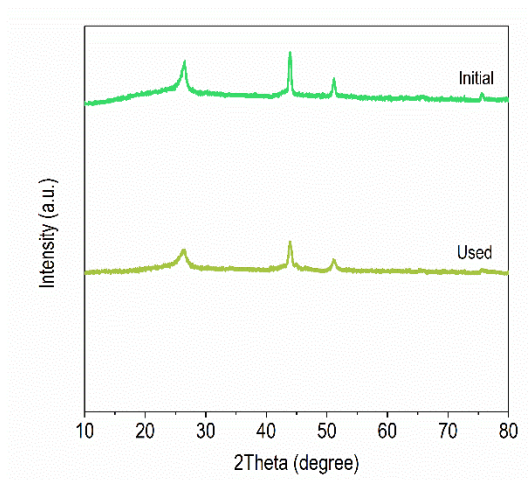

**Fig. S12** XRD pattern of HEA/HPC catalyst before and after HOR test.



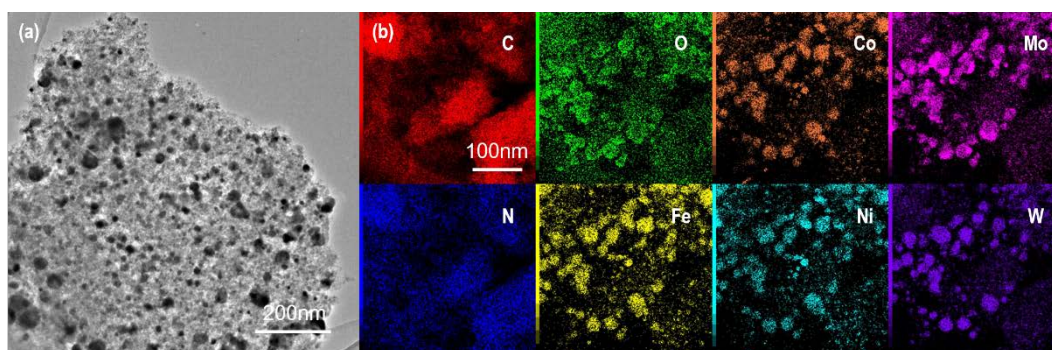

**Fig. S13** (a) TEM, and (b) STEM-EDX mapping images of the HEA/HPC catalyst after HOR stability test.

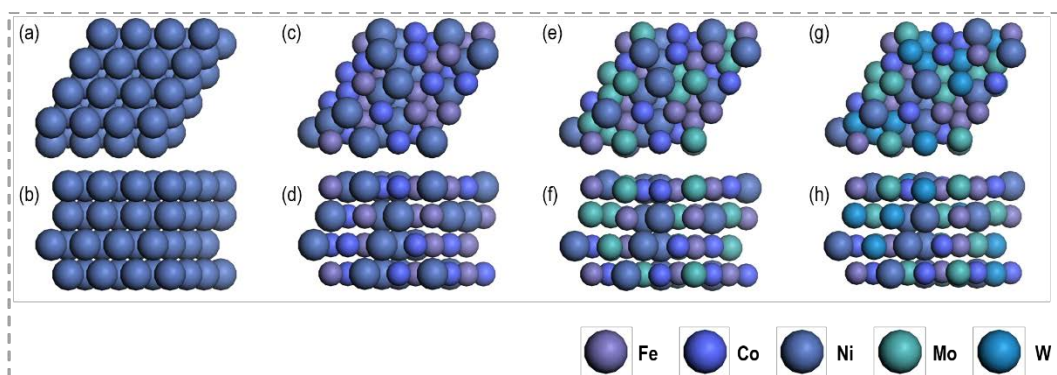

**Fig. S14** The top view and side view of the optimized Ni model (a,b), FeCoNi model (c,d), FeCoNiMo model (e,f), and FeCoNiMoW model (g,h).

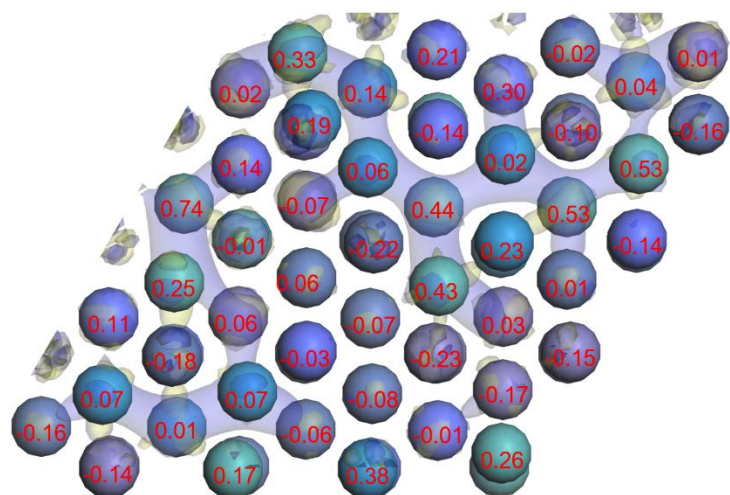

**Fig. S15** Charge density difference analysis of FeCoNiMoW.

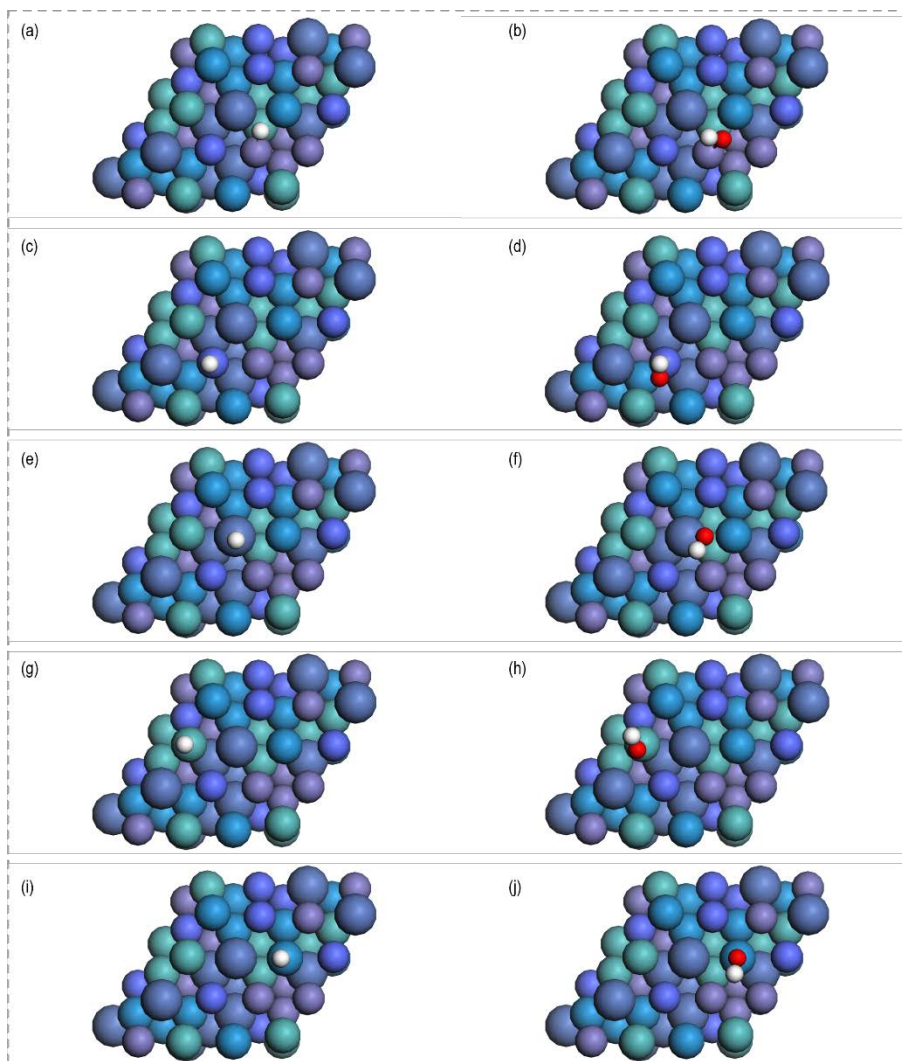

**Fig. S16** The adsorption sites of \*H and \*OH on Fe atom (a,b), Co atom (c,d), Ni atom (e,f), Mo atom (g,h), and W atom (i,j) of FeCoNiMoW slab.

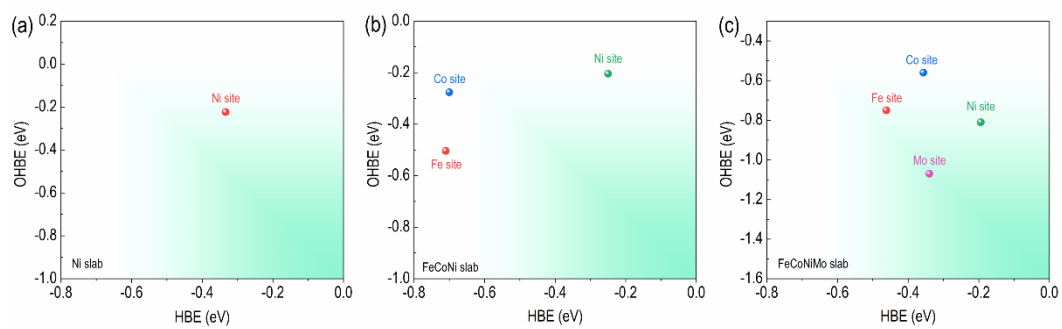

**Fig. S17** The calculated HBE and OHBE on different surface metal sites of Ni slab (a), FeCoNi slab (b), and FeCoNiMo slab (c).

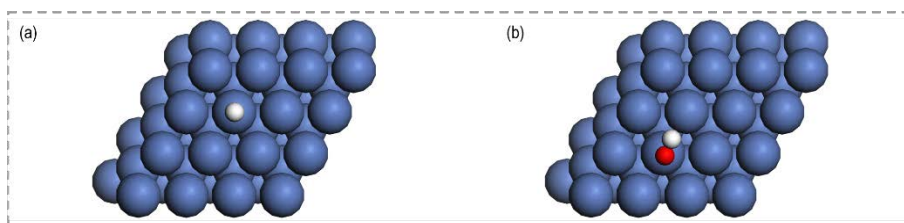

**Fig. S18** The adsorption sites of \*H (a) and \*OH (b) on Ni atom of Ni slab.

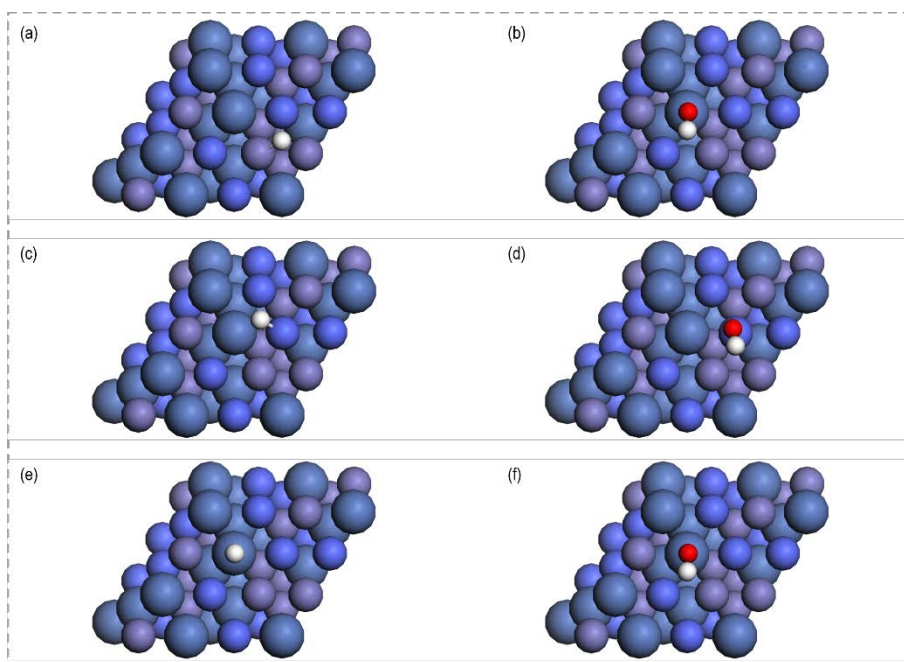

**Fig. S19** The adsorption sites of \*H and \*OH on Fe atom (a,b), Co atom (c,d), and Ni atom (e,f) of FeCoNi slab.

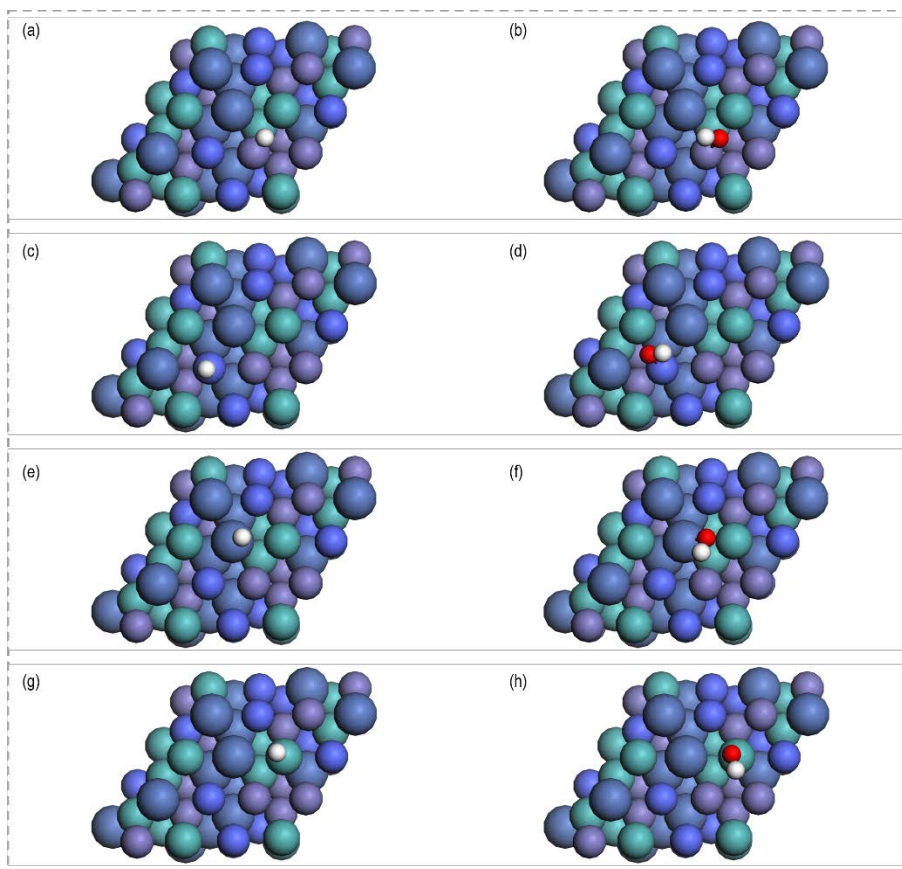

**Fig. S20** The adsorption sites of \*H and \*OH on Fe atom (a,b), Co atom (c,d), Ni atom (e,f), and Mo atom (g,h) of FeCoNiMo slab.



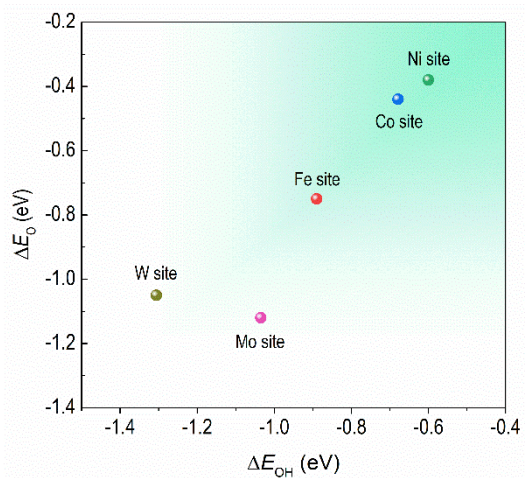

**Fig. S21** The calculated OBE and OHBE on different surface metal sites of FeCoNiMoW slab.

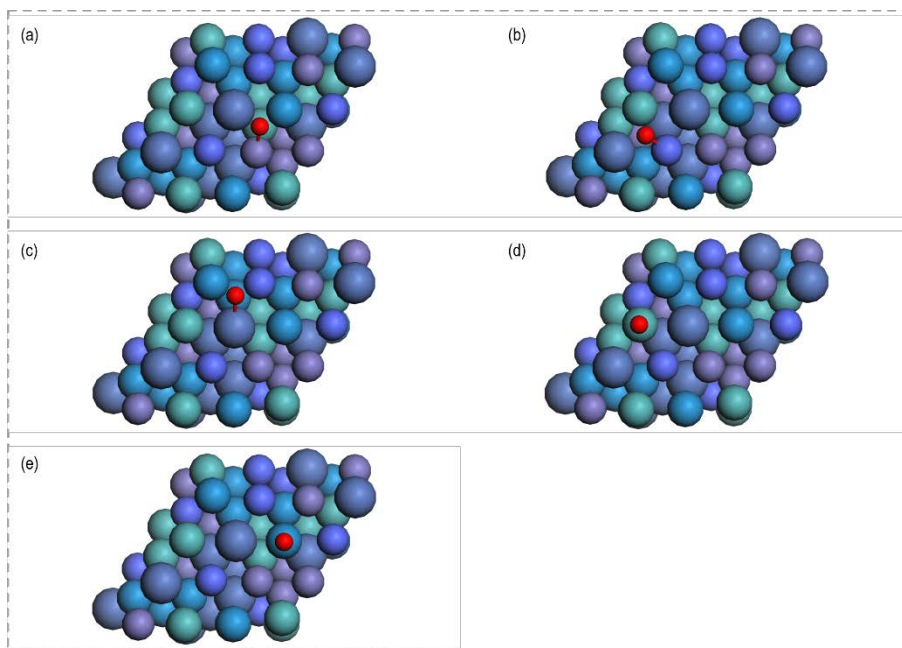

**Fig. S22** The adsorption sites of \*O on Fe atom (a), Co atom (b), Ni atom (c), Mo atom (d), and W atom (e) of FeCoNiMoW slab.

### 3. References

- 1 G. Zhao, L. Xia, P. Cui, Y. Qian, Y. Jiang, Y. Zhao, H. Pan, S. X. Dou and W. Sun, Atomic-Level Modulation of the Interface Chemistry of Platinum–Nickel Oxide toward Enhanced Hydrogen Electrocatalysis Kinetics, *Nano Letters*, 2021, **21**, 4845-4852.
- 2 G. Wang, J. Parrondo, C. He, Y. Li and V. Ramani, Pt/C/Ni(OH)<sub>2</sub> Bi-Functional Electrocatalyst for Enhanced Hydrogen Evolution Reaction Activity under Alkaline Conditions, *Journal of The Electrochemical Society*, 2017, **164**, F1307-F1315.
- 3 J. Ohyama, T. Sato, Y. Yamamoto, S. Arai and A. Satsuma, Size Specifically High Activity of Ru Nanoparticles for Hydrogen Oxidation Reaction in Alkaline Electrolyte, *Journal of the American Chemical Society*, 2013, **135**, 8016-8021.
- 4 M. D. Segall, J. D. L. Philip, M. J. Probert, C. J. Pickard, P. J. Hasnip, S. J. Clark and M. C. Payne, First-principles simulation: ideas, illustrations and the CASTEP code, *Journal of Physics: Condensed Matter*, 2002, **14**, 2717.
- 5 G. Kresse and J. Furthmüller, Efficient iterative schemes for ab initio total-energy calculations using a plane-wave basis set, *Physical Review B*, 1996, **54**, 11169-11186.
- 6 G. Kresse and D. Joubert, From ultrasoft pseudopotentials to the projector augmented-wave method, *Physical Review B*, 1999, **59**, 1758-1775.
- 7 J. P. Perdew, K. Burke and M. Ernzerhof, Generalized Gradient Approximation Made Simple, *Physical Review Letters*, 1996, **77**, 3865-3868.
- 8 B. Hammer, L. B. Hansen and J. K. Nørskov, Improved adsorption energetics within density-functional theory using revised Perdew-Burke-Ernzerhof functionals, *Physical Review B*, 1999, **59**, 7413-7421.
- 9 V. Viswanathan, H. A. Hansen, J. Rossmeisl and J. K. Nørskov, Unifying the 2e<sup>-</sup> and 4e<sup>-</sup> Reduction of Oxygen on Metal Surfaces, *The Journal of Physical Chemistry Letters*, 2012, **3**, 2948-2951.
- 10 J. K. Nørskov, J. Rossmeisl, A. Logadottir, L. Lindqvist, J. R. Kitchin, T. Bligaard and H. Jónsson, Origin of the Overpotential for Oxygen Reduction at a Fuel-Cell Cathode, *The Journal of Physical Chemistry B*, 2004, **108**, 17886-17892.
